# Supplementary material for: Hub gene associated with prognosis in bladder cancer is a novel therapeutic target
Source: PeerJ. 2023 Aug 16;11:e15670. doi: 10.7717/peerj.15670 (PMC10439716; doi:10.7717/peerj.15670)
Supplement: Supplemental Information 3 — The inhibition of Selinexor in bladder cancer lines. [file peerj-11-15670-s003.xlsx]

## Sheet: Sheet1
The inhibition rate of Selinexor in T24 cell line
Time	24h						48h						72h
0.078	7.42686	5.62641	2.3856	4.90623	5.71643	6.16654	26.9168	17.1395	19.7421	14.4666	21.2192	10.8089	11.1601	23.2566	28.0159	18.6295	20.943	21.2735
0.156	17.4194	14.4486	14.3586	12.5581	17.8695	5.08627	44.9238	33.5287	35.2872	30.5744	35.4279	30.9965	24.182	42.6903	46.7225	44.6733	45.4005	44.2767
0.312	14.8987	10.6677	10.6677	9.13728	0	16.2491	48.8628	45.6272	44.9941	46.823	43.728	46.5416	66.0901	68.0071	66.4206	66.9494	68.4698	66.8172
0.625	28.8522	17.4194	22.4606	10.9377	6.25656	16.6992	49.4959	51.6061	49.6366	46.3306	50.1993	43.6577	69.5274	71.0477	69.6596	70.8494	71.9731	73.1629
1.25	25.0713	5.17629	10.3976	8.68717	11.4779	10.8477	49.5662	49.9883	50.973	55.1231	44.9238	46.7526	74.0223	79.8392	76.9307	74.485	72.4358	71.3121
2.5	25.4314	21.5604	18.6797	17.9595	18.4096	16.069	56.4596	56.8816	54.7714	55.8265	55.2638	53.1536	80.3019	80.5002	82.1527	79.7731	77.1951	77.5256
5	33.0833	27.3218	30.3826	26.1515	25.7014	21.7404	64.3376	59.2028	61.0317	69.4021	66.1665	64.2673	83.8713	84.9289	85.8544	83.8052	83.4086	83.673
The inhibition rate of Selinexor in MB49 cell line
Time	24h						48h						72h
0.078	0	23.0769	19.3846	4	16.9231	13.5385	6.79934	23.7148	20.7297	12.7695	15.5058	37.1476	18.6861	22.7737	28.0292	26.2774	24.5255	23.3577
0.156	19.6923	25.5385	19.3846	29.5385	23.6923	16	20.2322	32.9187	27.1973	29.4362	31.1774	47.5954	34.1606	48.4672	40.292	47.8832	46.7153	45.8394
0.312	25.8462	40.3077	30.4615	32.6154	34.4615	31.0769	42.6202	42.6202	42.3715	35.9038	40.6302	47.0978	47.0073	52.2628	51.9708	50.8029	52.5547	60.438
0.625	30.4615	37.2308	37.8462	40.9231	31.3846	53.5385	50.5804	41.1277	47.8441	42.3715	44.6103	53.8143	49.635	52.8467	59.562	59.854	72.1168	61.0219
1.25	44.6154	37.8462	58.1538	37.2308	51.0769	67.0769	51.3267	53.8143	48.8391	54.8093	55.8043	57.5456	60.146	58.3942	63.6496	62.7737	63.9416	73.8686
2.5	50.4615	47.0769	53.8462	48.6154	46.7692	70.1538	55.8043	60.2819	51.0779	54.8093	57.0481	61.5257	58.1022	56.0584	56.3504	64.8175	61.0219	64.8175
5	52.6154	54.1538	51.6923	47.3846	54.7692	63.6923	57.2968	62.0232	60.5307	64.5108	58.5406	72.471	57.8102	58.6861	60.438	60.146	60.438	71.5328
EJ cell line was treated by Selinexor in vitro
Time	24h						48h						72h
0.078	18.7721	21.0802	25.327	21.4495	24.3114	17.8489	6.90743	5.32959	4.5582	18.6185	24.4039	12.5526	13.6645	0	7.82565	7.58236	15.1242	0
0.156	28.9275	25.05	22.8343	28.0043	27.912	21.9111	10.8696	7.39832	5.6101	5.36466	5.82048	4.03226	24.9772	24.0649	38.0537	23.1526	39.5134	31.4242
0.312	29.8507	27.912	24.8654	23.9421	28.0966	27.7273	2.6648	21.1431	15.6381	17.777	28.9972	15.533	47.2985	49.2448	50.0355	64.5109	46.2038	38.5403
0.625	26.3425	24.4038	24.8654	30.0354	30.3124	23.5729	24.3338	33.4151	20.3366	13.2539	24.6844	33.2749	49.2448	57.2124	61.3482	52.8332	55.0836	50.0355
1.25	29.2045	26.0655	30.497	28.3736	33.7283	33.359	50.9818	44.8457	35.5189	35.7644	24.6844	24.0533	71.6878	55.3877	73.1475	64.3284	66.5788	56.4825
2.5	24.773	33.6359	30.3124	32.0665	35.667	33.8206	42.7419	45.8626	46.9495	53.331	44.3548	45.1262	80.9934	80.8718	86.3457	84.8251	83.3654	69.7415
5	32.2511	33.082	32.4358	33.6359	36.8672	41.2987	58.0645	62.5877	56.3464	66.129	62.1669	61.3955	96.7461	92.1237	93.2793	89.7516	90.7248	92.3061
The inhibition rate of Selinexor in HT1376 cell line
Time	24h						48h						72h
0.078	16.5651	18.0926	17.0015	26.6024	20.3291	20.8746	33.7548	13.2872	20.5868	27.2424	25.8826	24.9523	5.89616	10.4357	9.02687	19.0451	11.2184	13.0968
0.156	25.8933	29.439	20.1109	20.7655	18.3108	28.1844	40.3387	48.1393	47.1374	45.9208	47.5668	46.9943	45.6561	48.1607	52.2306	60.8401	51.448	38.6121
0.312	19.1836	29.2754	19.129	25.7296	26.8752	18.529	56.2261	54.8664	52.1469	55.7968	62.3092	56.2261	58.179	62.7185	62.562	62.562	59.7443	58.0224
0.625	32.3302	32.8757	34.5668	37.2943	33.2576	33.694	62.7385	67.104	67.4618	67.7481	68.4637	66.3884	71.4845	74.9283	80.7201	77.2763	73.5194	74.7717
1.25	37.7853	36.8579	38.6581	38.8763	34.1304	33.8031	75.0477	73.0439	70.6823	72.3282	69.7519	72.3998	85.4161	91.521	93.7125	89.3295	90.1122	89.3295
2.5	44.004	45.4769	42.2584	49.7318	37.0761	38.3853	80.6298	78.8406	79.9857	84.6374	78.5544	86.4265	89.0164	92.6167	94.0256	96.5301	95.4344	96.2171
5	39.3672	39.3127	44.8223	41.4947	36.8033	41.7674	88.2872	88.3588	89.9332	89.0029	89.2891	89.8616	95.7475	99.1912	98.8782	96.6867	90.4253	98.7216
