# Supplementary material for: Hub gene associated with prognosis in bladder cancer is a novel therapeutic target
Source: PeerJ. 2023 Aug 16;11:e15670. doi: 10.7717/peerj.15670 (PMC10439716; doi:10.7717/peerj.15670)
Supplement: Supplemental Information 4 — The growth of Bladder cancer treated by Selinexor. [file peerj-11-15670-s004.xlsx]

## Sheet: Sheet1
days	Control			Selinexor
1	190.89	112.76	137.53	107.2	108.28	110.52
4	301.3	322.13	145.9	130.39	128.43	113.23
8	769.43	729.96	291.79	310.58	399.68	44.3
11	1882.31	1360.09	941.53	444.38	525.02	39.34
15	2201.16	2280.66	1711.45	447.74	688.35	39.51
